# Supplementary material
Source: publisher figshare collection journal article supplement (https://gsajournals.figshare.com/ndownloader/files/25732721)
Supplement: Supplementary file 1 [file 25732721]

## Sheet: Sheet1
Table S1
Label No.	EcoCyc Pathway ID	Pathway name
1	HOMOSER-THRESYN-PWY	L-threonine biosynthesis
2	PWY0-1505	ArcAB two-component signal transduction system, quinone dependent
3	XYLCAT-PWY	xylose degradation I
4	PYRUVDEHYD-PWY	pyruvate decarboxylation to acetyl CoA
5	PWY0-1458	PhoQP two-component signal transduction system, magnesium-dependent
6	PWY0-1487	CreCB two-component signal transduction system
7	GLUTATHIONESYN-PWY	glutathione biosynthesis
8	PWY0-1509	NtrBC two-component signal transduction system, nitrogen-dependent
9	PWY0-1474	AtoSC two-component signal transduction system
10	PWY-6890	4-amino-2-methyl-5-diphosphomethylpyrimidine biosynthesis
11	PWY0-1554	5-(carboxymethoxy)uridine biosynthesis
12	PWY-66	GDP-L-fucose biosynthesis I (from GDP-D-mannose)
13	GLUTDEG-PWY	L-glutamate degradation II
14	PWY-7335	UDP-N-acetyl-alpha-D-mannosaminouronate biosynthesis
15	PWY0-1500	EnvZ two-component signal transduction system, osmotic responsive
16	PWY0-1470	QseBC two-component signal transduction system, quorum sensing related
17	PWY0-1468	DcuSR two-component signal transduction system, dicarboxylate-dependent
18	PWY-6153	autoinducer AI-2 biosynthesis I
19	PWY0-1490	EvgSA two-component signal transduction system
20	BETSYN-PWY	glycine betaine biosynthesis I (Gram-negative bacteria)
21	PWY0-1499	DpiBA two-component signal transduction system
22	PWY-7343	UDP-alpha-D-glucose biosynthesis I
23	2PHENDEG-PWY	phenylethylamine degradation I
24	PWY0-1264	biotin-carboxyl carrier protein assembly
25	PWY-7761	NAD salvage pathway II
26	PWY0-1559	BtsSR two-component signal transduction system
27	PWY0-1550	YpdAB two-component signal transduction system
28	GLUAMCAT-PWY	N-acetylglucosamine degradation I
29	GLUTSYN-PWY	L-glutamate biosynthesis I
30	GLUCONSUPER-PWY	D-gluconate degradation
31	RIBOKIN-PWY	ribose phosphorylation
32	PWY-6910	hydroxymethylpyrimidine salvage
33	ALKANEMONOX-PWY	Two-component alkanesulfonate monooxygenase
34	PWY-6147	6-hydroxymethyl-dihydropterin diphosphate biosynthesis I
35	PWY-40	putrescine biosynthesis I
36	PWY0-1182	trehalose degradation II (trehalase)
37	PWY0-461	L-lysine degradation I
38	TREDEGLOW-PWY	Trehalose degradation I (low osmolarity)
39	PWY0-1492	UhpBA two-component signal transduction system
40	PWY0-1483	PhoRB two-component signal transduction system, phosphate-dependent
41	PWY0-1485	CpxAR two-component signal transduction system
42	PWY-901	methylglyoxal degradation II (no longer recognized as a pathway in ecocyc)
43	PWY0-1587	N6-L-threonylcarbamoyladenosine37-modified tRNA biosynthesis
44	PWY0-1498	ZraSR two-component signal transduction system
45	PWY0-1482	BasSR two-component signal transduction system
46	CYANCAT-PWY	cyanate degradation
47	PWY-7247	beta-D-glucuronide and D-glucuronate degradation
48	PWY0-1021	L-alanine biosynthesis III
49	PWY-2161	folate polyglutamylation
50	PWY0-1503	GlrKR two-component signal transduction system
51	PWY-6019	pseudouridine degradation
52	ENTNER-DOUDOROFF-PWY	Entner-Doudoroff pathway I
53	BSUBPOLYAMSYN-PWY	spermidine biosynthesis I
54	TRESYN-PWY	trehalose biosynthesis I
55	PWY0-1477	ethanolamine utilization
56	PWY-7194	pyrimidine nucleobases salvage II
57	PWY0-1433	tetrahydromonapterin biosynthesis
58	PWY-6605	adenine and adenosine salvage II
59	PWY0-1588	HprSR two-component signal transduction system
60	PWY0-1280	ethylene glycol degradation
61	PWY0-1317	L-lactaldehyde degradation (aerobic)
62	PWY-5459	methylglyoxal degradation IV
63	ALANINE-SYN2-PWY	L-alanine biosynthesis II
64	PWY-7179	purine deoxyribonucleosides degradation I
65	PWY-7176	UTP and CTP de novo biosynthesis
66	PWY0-1519	aerotactic two-component signal transduction system
67	PWY0-1481	BaeSR two-component signal transduction system
68	PWY0-1501	BarA UvrY two-component signal transduction system
69	PWY0-1512	CusSR two-component signal transduction system
70	PWY0-1506	TorSR two-component signal transduction system, TMAO dependent
71	PWY-6703	preQ0 biosynthesis
72	PWY-7197	pyrimidine deoxyribonucleotide phosphorylation
73	PWY-7205	CMP phosphorylation
74	PWY0-1534	hydrogen sulfide biosynthesis I
75	ASPARAGINESYN-PWY	L-asparagine biosynthesis II
76	PWY0-1325	superpathway of L-asparagine biosynthesis
77	PWY-7193	pyrimidine ribonucleosides salvage I
78	PWY-6537	4-aminobutanoate degradation II
79	PWY0-1495	KdpDE two-component signal transduction system, potassium-dependent
80	PWY0-1517	sedoheptulose bisphosphate bypass
81	PWY0-1309	chitobiose degradation
82	PWY0-1497	RstBA two-component signal transduction system
83	PWY-5123	trans, trans-farnesyl diphosphate biosynthesis
84	PWY0-661	PRPP biosynthesis II
85	PROSYN-PWY	L-proline biosynthesis I
86	GLYCLEAV-PWY	glycine cleavage
87	SERSYN-PWY	L-serine biosynthesis
88	PWY-5340	sulfate activation for sulfonation
89	PWY-5901	2,3-dihydroxybenzoate biosynthesis
90	CYSTSYN-PWY	L-cysteine biosynthesis I
91	PWY0-1515	NarX two-component signal transduction system, nitrate dependent
92	KDOSYN-PWY	kdo transfer to lipid IVA I
93	PWY0-1514	NarQ two-component signal transduction system, nitrate dependent
94	PWY0-1275	lipoate biosynthesis and incorporation II
95	PWY0-901	L-selenocysteine biosynthesis I (bacteria)
96	PWY0-521	fructoselysine and psicoselysine degradation
97	PANTO-PWY	phosphopantothenate biosynthesis I
98	PWY-7221	guanosine ribonucleotides de novo biosynthesis
99	AMMASSIM-PWY	ammonia assimilation cycle III
100	PWY-5965	fatty acid biosynthesis initiation III
101	IDNCAT-PWY	L-idonate degradation
102	LYXMET-PWY	L-lyxose degradation
103	PUTDEG-PWY	putrescine degradation I
104	GALACTCAT-PWY	D-galactonate degradation
105	HOMOSERSYN-PWY	L-homoserine biosynthesis
106	PWY-1801	formaldehyde oxidation II (glutathione-dependent)
107	THREONINE-DEG2-PWY	L-threonine degradation II
108	PWY0-1303	aminopropylcadaverine biosynthesis
109	PWY0-1312	acetate formation from acetyl-CoA I
110	SALVPURINE2-PWY	xanthine and xanthosine salvage
111	ASPARAGINE-DEG1-PWY	L-asparagine degradation I
112	PWY0-44	D-allose degradation
113	ALADEG-PWY	L-alanine degradation I
114	NADPHOS-DEPHOS-PWY	NAD phosphorylation and dephosphorylation
115	PWY0-1493	RcsCDB two-component signal transduction system
116	PPGPPMET-PWY	ppGpp biosynthesis
117	PWY-6543	4-aminobenzoate biosynthesis
118	PLPSAL-PWY	pyridoxal 5'-phosphate salvage I
119	PWY0-1415	superpathway of heme b biosynthesis from uroporphyrinogen-III
120	PWY0-1518	chemotactic two-component signal transduction
121	OXIDATIVEPENT-PWY	pentose phosphate pathway (oxidative branch) I
122	PWY-6038	citrate degradation
123	PWY0-823	L-arginine degradation III (arginine decarboxylase/agmatinase pathway)
124	PWY-7181	pyrimidine deoxyribonucleosides degradation
125	THIOREDOX-PWY	thioredoxin pathway
126	PWY0-1337	oleate beta-oxidation
127	PWY-6614	tetrahydrofolate biosynthesis
128	PWY-6535	4-aminobutanoate degradation I
129	PWY0-1300	2-O-alpha-mannosyl-D-glycerate degradation
130	PWY-7208	superpathway of pyrimidine nucleobases salvage
131	PWY-5698	allantoin degradation to ureidoglycolate II (ammonia producing)
132	PYRIDNUCSAL-PWY	NAD salvage pathway I
133	ETOH-ACETYLCOA-ANA-PWY	ethanol degradation I
134	PWY-5162	2-oxopentenoate degradation
135	THRDLCTCAT-PWY	L-threonine degradation III (to methylglyoxal)
136	UDPNAGSYN-PWY	UDP-N-acetyl-D-glucosamine biosynthesis I
137	PWY0-1319	CDP-diacylglycerol biosynthesis II
138	PWY0-1569	autoinducer AI-2 degradation
139	PWY-5436	L-threonine degradation IV
140	PWY0-1324	N-acetylneuraminate and N-acetylmannosamine degradation I
141	PWY0-43	conversion of succinate to propanoate
142	SER-GLYSYN-PWY	superpathway of L-serine and glycine biosynthesis I
143	PWY0-1241	ADP-L-glycero-beta-D-manno-heptose biosynthesis
144	PWY-6708	ubiquinol-8 biosynthesis (prokaryotic)
145	PWY-7545	pyruvate to cytochrome bd oxidase electron transfer
146	PYRIDNUCSYN-PWY	NAD biosynthesis I (from aspartate)
147	PWY0-1568	NADH to cytochrome bd oxidase electron transfer II
148	PANTOSYN-PWY	superpathway of coenzyme A biosynthesis I (bacteria)
149	PWY-7242	D-fructuronate degradation
150	PWY-6897	thiamine salvage II
151	GLYCEROLMETAB-PWY	glycerol degradation V
152	FUCCAT-PWY	fucose degradation
153	PWY-6556	pyrimidine ribonucleosides salvage II
154	PWY0-1338	polymyxin resistance
155	PWY-5966	fatty acid biosynthesis initiation II
156	PWY-7195	pyrimidine ribonucleosides salvage III
157	PWY-7446	sulfoquinovose degradation I
158	ACETOACETATE-DEG-PWY	acetoacetate degradation (to acetyl CoA)
159	PWY0-301	L-ascorbate degradation I (bacterial, anaerobic)
160	KDO-LIPASYN-PWY	(Kdo)2-lipid A biosynthesis I
161	GLYCOGENSYNTH-PWY	glycogen biosynthesis I (from ADP-D-Glucose)
162	PWY-6700	queuosine biosynthesis
163	AST-PWY	L-arginine degradation II (AST pathway)
164	ALANINE-VALINESYN-PWY	L-alanine biosynthesis I
165	PWY-4381	fatty acid biosynthesis initiation I
166	PWY0-1507	biotin biosynthesis from 8-amino-7-oxononanoate I
167	PWY-6611	adenine and adenosine salvage V
168	PWY0-1573	nitrate reduction VIIIb (dissimilatory)
169	PWY-7180	2'-deoxy-alpha-D-ribose 1-phosphate degradation
170	SERDEG-PWY	L-serine degradation
171	DARABCATK12-PWY	D-arabinose degradation I
172	PWY-5785	di-trans,poly-cis-undecaprenyl phosphate biosynthesis
173	PWY0-1221	putrescine degradation II
174	TYRSYN	L-tyrosine biosynthesis I
175	PWY0-1545	cardiolipin biosynthesis III
176	PWY0-181	salvage pathways of pyrimidine deoxyribonucleotides
177	PWY-1269	CMP-3-deoxy-D-manno-octulosonate biosynthesis
178	PWY-7206	pyrimidine deoxyribonucleotides dephosphorylation
179	PWY-5705	allantoin degradation to glyoxylate III
180	PWY0-1295	pyrimidine ribonucleosides degradation
181	GLYOXDEG-PWY	glycolate and glyoxylate degradation II
182	PWY-6164	3-dehydroquinate biosynthesis I
183	CARNMET-PWY	L-carnitine degradation I
184	PWY-5350	thiosulfate disproportionation IV (rhodanese)
185	PWY-5659	GDP-mannose biosynthesis
186	PWY-6122	5-aminoimidazole ribonucleotide biosynthesis II
187	PWY-6121	5-aminoimidazole ribonucleotide biosynthesis I
188	PWY0-1565	D-lactate to cytochrome bo oxidase electron transfer
189	PWY0-1567	NADH to cytochrome bo oxidase electron transfer II
190	PWY0-1544	proline to cytochrome bo oxidase electron transfer
191	PWY-7544	pyruvate to cytochrome bo oxidase electron transfer
192	PWY0-1561	glycerol-3-phosphate to cytochrome bo oxidase electron transfer
193	PWY-6123	inosine-5'-phosphate biosynthesis I
194	UBISYN-PWY	superpathway of ubiquinol-8 biosynthesis (prokaryotic)
195	TRPSYN-PWY	L-tryptophan biosynthesis
196	PWY0-501	lipoate biosynthesis and incorporation I
197	DAPLYSINESYN-PWY	L-lysine biosynthesis I
198	GALACTUROCAT-PWY	D-galacturonate degradation I
199	GALACTMETAB-PWY	galactose degradation I (Leloir pathway)
200	LCYSDEG-PWY	L-cysteine degradation II
201	ACETATEUTIL-PWY	superpathway of acetate utilization and formation
202	PWY0-41	allantoin degradation IV (anaerobic)
203	PWY-6961	L-ascorbate degradation II (bacterial, aerobic)
204	COBALSYN-PWY	adenosylcobalamin salvage from cobinamide I
205	PWY-6012	acyl carrier protein metabolism
206	FASYN-INITIAL-PWY	superpathway of fatty acid biosynthesis initiation (E. coli)
207	PWY-4621	arsenate detoxification II (glutaredoxin)
208	DTDPRHAMSYN-PWY	dTDP-L-rhamnose biosynthesis I
209	GALACTARDEG-PWY	D-galactarate degradation I
210	PWY-6620	guanine and guanosine salvage
211	PHESYN	L-phenylalanine biosynthesis I
212	PWY-4261	glycerol degradation I
213	PWY-5386	methylglyoxal degradation I
214	PWY-5668	cardiolipin biosynthesis I
215	GLUCARDEG-PWY	D-glucarate degradation I
216	PWY0-1296	purine ribonucleosides degradation
217	PWY-6151	S-adenosyl-L-methionine cycle I
218	PWY0-1546	muropeptide degradation
219	GLUT-REDOX-PWY	glutathione-glutaredoxin redox reactions
220	GLCMANNANAUT-PWY	superpathway of N-acetylglucosamine, N-acetylmannosamine and N-acetylneuraminate degradation
221	PWY0-1471	uracil degradation III
222	PWY-5971	palmitate biosynthesis II (bacteria and plants)
223	PWY0-862	(5Z)-dodec-5-enoate biosynthesis I
224	4AMINOBUTMETAB-PWY	superpathway of 4-aminobutanoate degradation
225	PWY-6277	superpathway of 5-aminoimidazole ribonucleotide biosynthesis
226	GLUTORN-PWY	L-ornithine biosynthesis I
227	PYRIDOXSYN-PWY	pyridoxal 5'-phosphate biosynthesis I
228	THRESYN-PWY	superpathway of L-threonine biosynthesis
229	P2-PWY	citrate lyase activation
230	DETOX1-PWY	superoxide radicals degradation
231	RIBOSYN2-PWY	flavin biosynthesis I (bacteria and plants)
232	PWY0-1584	nitrate reduction X (dissimilatory, periplasmic)
233	GLUCUROCAT-PWY	superpathway of beta-D-glucuronosides degradation
234	PWY-6579	superpathway of guanine and guanosine salvage
235	PWY-7315	dTDP-N-acetylthomosamine biosynthesis
236	HOMOSER-METSYN-PWY	L-methionine biosynthesis I
237	NRI-PWY	Nitrogen regulation two-component system
238	PWY-6952	glycerophosphodiester degradation
239	PWY-5437	L-threonine degradation I
240	GLUCARGALACTSUPER-PWY	superpathway of D-glucarate and D-galactarate degradation
241	PWY-6609	adenine and adenosine salvage III
242	PWY-5453	methylglyoxal degradation III
243	PWY0-42	2-methylcitrate cycle I
244	PWY-6163	chorismate biosynthesis from 3-dehydroquinate
245	PWY0-1297	superpathway of purine deoxyribonucleosides degradation
246	GLYOXYLATE-BYPASS	glyoxylate cycle
247	POLYISOPRENSYN-PWY	polyisoprenoid biosynthesis (E. coli)
248	PWY-6282	palmitoleate biosynthesis I (from (5Z)-dodec-5-enoate)
249	FASYN-ELONG-PWY	fatty acid elongation - saturated
250	LEUSYN-PWY	L-leucine biosynthesis
251	ILEUSYN-PWY	L-isoleucine biosynthesis I (from threonine)
252	METSYN-PWY	L-homoserine and L-methionine biosynthesis
253	PWY0-1353	succinate to cytochrome bd oxidase electron transfer
254	ASPASN-PWY	superpathway of L-aspartate and L-asparagine biosynthesis
255	PWY0-1533	methylphosphonate degradation I
256	PWY-7220	adenosine deoxyribonucleotides de novo biosynthesis II
257	PWY-7222	guanosine deoxyribonucleotides de novo biosynthesis II
258	PWY0-1582	glycerol-3-phosphate to fumarate electron transfer
259	NONOXIPENT-PWY	pentose phosphate pathway (non-oxidative branch)
260	FAO-PWY	fatty acid beta-oxidation I
261	ORNDEG-PWY	superpathway of ornithine degradation
262	KETOGLUCONMET-PWY	ketogluconate metabolism
263	PWY0-381	glycerol and glycerophosphodiester degradation
264	PWY-5837	1,4-dihydroxy-2-naphthoate biosynthesis
265	GLYCOCAT-PWY	glycogen degradation I
266	PWY-7187	pyrimidine deoxyribonucleotides de novo biosynthesis II
267	PWY-7184	pyrimidine deoxyribonucleotides de novo biosynthesis I
268	PWY0-1298	superpathway of pyrimidine deoxyribonucleosides degradation
269	GLYCOLATEMET-PWY	glycolate and glyoxylate degradation I
270	PWY-6284	superpathway of unsaturated fatty acids biosynthesis (E. coli)
271	PWY-5973	cis-vaccenate biosynthesis
272	GLUCOSE1PMETAB-PWY	glucose and glucose-1-phosphate degradation
273	SO4ASSIM-PWY	sulfate reduction I (assimilatory)
274	PWY-5686	UMP biosynthesis I
275	PWY0-1329	succinate to cytochrome bo oxidase electron transfer
276	VALSYN-PWY	L-valine biosynthesis
277	ENTBACSYN-PWY	enterobactin biosynthesis
278	PWY-6892	thiazole biosynthesis I (facultative anaerobic bacteria)
279	PWY0-845	superpathway of pyridoxal 5'-phosphate biosynthesis and salvage
280	GALACT-GLUCUROCAT-PWY	superpathway of hexuronide and hexuronate degradation
281	NAGLIPASYN-PWY	lipid IVA biosynthesis
282	PWY-6690	cinnamate and 3-hydroxycinnamate degradation to 2-oxopent-4-enoate
283	HCAMHPDEG-PWY	3-phenylpropanoate and 3-(3-hydroxyphenyl)propanoate degradation to 2-oxopent-4-enoate
284	GALACTITOLCAT-PWY	galactitol degradation
285	PWY-6612	superpathway of tetrahydrofolate biosynthesis
286	PWY0-1355	formate to trimethylamine N-oxide electron transfer
287	PWY0-1576	hydrogen to fumarate electron transfer
288	FUC-RHAMCAT-PWY	superpathway of fucose and rhamnose degradation
289	PWY0-1061	superpathway of L-alanine biosynthesis
290	PWY0-1479	tRNA processing
291	PWY-6519	8-amino-7-oxononanoate biosynthesis I
292	PWY0-163	salvage pathways of pyrimidine ribonucleotides
293	NONMEVIPP-PWY	methylerythritol phosphate pathway I
294	PWY0-881	superpathway of fatty acid biosynthesis I (E. coli)
295	HISTSYN-PWY	L-histidine biosynthesis
296	LIPA-CORESYN-PWY	Lipid A-core biosynthesis
297	PWY-6823	molybdenum cofactor biosynthesis
298	PWY-6125	superpathway of guanosine nucleotides de novo biosynthesis II
299	PWY0-1581	nitrate reduction IX (dissimilatory)
300	PWY0-1356	formate to dimethyl sulfoxide electron transfer
301	PWY0-1578	hydrogen to trimethylamine N-oxide electron transfer
302	POLYAMSYN-PWY	superpathway of polyamine biosynthesis I
303	OANTIGEN-PWY	O-antigen building blocks biosynthesis (E. coli)
304	PHOSLIPSYN-PWY	superpathway of phospholipid biosynthesis I (bacteria)
305	PWY-7196	superpathway of pyrimidine ribonucleosides salvage
306	ECASYN-PWY	enterobacterial common antigen biosynthesis
307	PWY0-162	superpathway of pyrimidine ribonucleotides de novo biosynthesis
308	PWY-7219	adenosine ribonucleotides de novo biosynthesis
309	GLUTAMINDEG-PWY	L-glutamine degradation I
310	MET-SAM-PWY	superpathway of S-adenosyl-L-methionine biosynthesis
311	1CMET2-PWY	N10-formyl-tetrahydrofolate biosynthesis
312	PWY0-1577	hydrogen to dimethyl sulfoxide electron transfer
313	PENTOSE-P-PWY	pentose phosphate pathway
314	ARO-PWY	chorismate biosynthesis I
315	COLANSYN-PWY	colanic acid building blocks biosynthesis
316	PWY0-1261	anhydromuropeptides recycling I
317	PWY0-1585	formate to nitrite electron transfer
318	PWY0-321	phenylacetate degradation I (aerobic)
319	PWY-5838	superpathway of menaquinol-8 biosynthesis I
320	THISYN-PWY	superpathway of thiamine diphosphate biosynthesis I
321	PWY-6387	UDP-N-acetylmuramoyl-pentapeptide biosynthesis I (meso-diaminopimelate containing)
322	PWY-7805	aminomethylphosphonate degradation
323	PWY-6608	guanosine nucleotides degradation III
324	GLYCOL-GLYOXDEG-PWY	superpathway of glycol metabolism and degradation
325	ARGSYN-PWY	L-arginine biosynthesis I (via L-ornithine)
326	PEPTIDOGLYCANSYN-PWY	peptidoglycan biosynthesis I (meso-diaminopimelate containing)
327	PWY0-1277	3-phenylpropanoate and 3-(3-hydroxyphenyl)propanoate degradation
328	PWY0-1321	nitrate reduction III (dissimilatory)
329	ARGDEG-PWY	superpathway of L-arginine, putrescine, and 4-aminobutanoate degradation
330	BIOTIN-BIOSYNTHESIS-PWY	biotin biosynthesis I
331	TRNA-CHARGING-PWY	tRNA charging
332	PWY-6071	superpathway of phenylethylamine degradation
333	PWY0-166	superpathway of pyrimidine deoxyribonucleotides de novo biosynthesis (E. coli)
334	SALVADEHYPOX-PWY	adenosine nucleotides degradation II
335	METHGLYUT-PWY	superpathway of methylglyoxal degradation
336	PWY0-1347	NADH to trimethylamine N-oxide electron transfer
337	ORNARGDEG-PWY	superpathway of L-arginine and L-ornithine degradation
338	PWY0-1334	NADH to cytochrome bd oxidase electron transfer I
339	PWY0-1348	NADH to dimethyl sulfoxide electron transfer
340	SULFATE-CYS-PWY	superpathway of sulfate assimilation and cysteine biosynthesis
341	PWY0-1335	NADH to cytochrome bo oxidase electron transfer I
342	PWY0-1336	NADH to fumarate electron transfer
343	P4-PWY	superpathway of L-lysine, L-threonine and L-methionine biosynthesis I
344	PWY-7211	superpathway of pyrimidine deoxyribonucleotides de novo biosynthesis
345	BRANCHED-CHAIN-AA-SYN-PWY	superpathway of branched chain amino acid biosynthesis
346	PWY0-1586	peptidoglycan maturation (meso-diaminopimelate containing)
347	TCA	TCA cycle I (prokaryotic)
348	PWY-6126	superpathway of adenosine nucleotides de novo biosynthesis II
349	GLUCONEO-PWY	gluconeogenesis I
350	PWY0-1352	nitrate reduction VIII (dissimilatory)
351	KDO-NAGLIPASYN-PWY	superpathway of (Kdo)2-lipid A biosynthesis
352	GLYCOLYSIS	glycolysis I (from glucose 6-phosphate)
353	PWY-5484	glycolysis II (from fructose 6-phosphate)
354	COMPLETE-ARO-PWY	superpathway of aromatic amino acid biosynthesis
355	PWY0-781	aspartate superpathway
356	TCA-GLYOX-BYPASS	superpathway of glyoxylate bypass and TCA
357	GLYCOLYSIS-E-D	superpathway of glycolysis and the Entner-Doudoroff pathway
358	THREOCAT-PWY	superpathway of L-threonine metabolism
359	ARG+POLYAMINE-SYN	superpathway of arginine and polyamine biosynthesis
360	LPSSYN-PWY	superpathway of lipopolysaccharide biosynthesis
361	HEXITOLDEGSUPER-PWY	superpathway of hexitol degradation (bacteria)
362	DENOVOPURINE2-PWY	superpathway of purine nucleotides de novo biosynthesis II
363	FERMENTATION-PWY	mixed acid fermentation
364	GLYCOLYSIS-TCA-GLYOX-BYPASS	superpathway of glycolysis, pyruvate dehydrogenase, TCA, and glyoxylate bypass
365	PRPP-PWY	superpathway of histidine, purine, and pyrimidine biosynthesis
366	ALL-CHORISMATE-PWY	superpathway of chorismate metabolism
TABLE S1. The pathways used in this study. This table provides the numeric labels used to identify the 366 EcoCyc pathways shown in Figure S1, the IDs used to identify pathways in the EcoCyc database, and the common names for pathways.
